# Supplementary material for: Comprehensive Immune Profiling Unveils a Subset of Leiomyosarcoma with “Hot” Tumor Immune Microenvironment
Source: MDPI journal article supplement (doi:10.3390/cancers15143705), 2023-07-21

Supplemental Table 1: **A:** Immune “hot” clusters T-H (identified by 90 gene signature method) and **B:** T-Hi (identified by CIBERSORT method) were strongly associated with Sarcoma Immune high Subclass E (SIC E) in TCGA cohort.

**A**

|              | T-C     | T-H     | p values |
|--------------|---------|---------|----------|
| All Subjects | 36      | 18      |          |
| SIC          |         |         | <0.001   |
| A            | 12(33%) | 0(0%)   |          |
| B            | 13(36%) | 2(11%)  |          |
| C            | 4(11%)  | 0(0%)   |          |
| D            | 7(19%)  | 6(33%)  |          |
| E            | 0(0%)   | 10(56%) |          |
| NA           | 0(0%)   | 0(0%)   |          |

90 gene signature

**B**

|              | T-Hi   | T-L    | T-M    | p values |
|--------------|--------|--------|--------|----------|
| All Subjects | 14     | 11     | 29     |          |
| SIC          |        |        |        | 0.094    |
| A            | 1(7%)  | 5(45%) | 6(21%) |          |
| B            | 3(21%) | 4(36%) | 8(28%) |          |
| C            | 0(0%)  | 0(0%)  | 4(14%) |          |
| D            | 4(29%) | 2(18%) | 7(24%) |          |
| E            | 6(43%) | 0(0%)  | 4(14%) |          |
| NA           | 0(0%)  | 0(0%)  | 0(0%)  |          |

CIBERSORT

Supplemental Table 2: The correlation between immune clusters and clinical factors in ICGC cohort. Although, there was no association observed between immune clusters defined by 90 gene signature method and clinical factors (**A**), there may be some association between immune clusters defined by CIBERSORT method and clinical factors (**B**). For example, the immune “hot” cluster T-Hi seemed to associate with grade 3 in TCGA cohort indicated by red arrow.

**A**

|                              | L-C         | L-H        | p values |
|------------------------------|-------------|------------|----------|
| All Subjects                 | 38          | 49         |          |
| Age.at.diagnosis             | 67.5(29-83) | 64(29-83)  | 0.235    |
| Sex                          |             |            | 0.359    |
| Female                       | 28(74%)     | 31(63%)    |          |
| Male                         | 10(26%)     | 18(37%)    |          |
| Size                         | 80(20-205)  | 80(15-230) | 0.837    |
| Size.cut                     |             |            | 0.952    |
| [ 15, 21]                    | 1(3%)       | 2(4%)      |          |
| [ 21, 51]                    | 10(26%)     | 11(22%)    |          |
| [ 51,100]                    | 14(37%)     | 17(35%)    |          |
| [100,230]                    | 13(34%)     | 19(39%)    |          |
| Grade                        |             |            | 0.824    |
| 1                            | 4(11%)      | 6(12%)     |          |
| 2                            | 19(50%)     | 21(43%)    |          |
| 3                            | 15(39%)     | 21(43%)    |          |
| LMS Classifiers              |             |            | 0.148    |
| hLMS                         | 20(53%)     | 16(33%)    |          |
| oLMS                         | 6(16%)      | 14(29%)    |          |
| unclass                      | 12(32%)     | 19(39%)    |          |
| Location.of.first.metastasis |             |            | 0.958    |
| Lung only                    | 7(18%)      | 9(18%)     |          |
| No Met                       | 20(53%)     | 24(49%)    |          |
| Other Met                    | 11(29%)     | 16(33%)    |          |
| Site.of.tumour               |             |            | 0.34     |
| Gynaecological area          | 5(13%)      | 3(6%)      |          |
| Internal trunk               | 19(50%)     | 23(47%)    |          |
| Others                       | 6(16%)      | 15(31%)    |          |
| Upper.Lower.limb             | 8(21%)      | 8(16%)     |          |
| Site.of.tumour.              |             |            | 0.289    |
| Gynaecological area          | 5(13%)      | 3(6%)      |          |
| Others                       | 33(87%)     | 46(94%)    |          |

**B**

|                              | L-Hi        | L-L         | L-M        | p values |
|------------------------------|-------------|-------------|------------|----------|
| All Subjects                 | 16          | 54          | 17         |          |
| Age.at.diagnosis             | 64.5(60-75) | 64.5(29-83) | 64(43-83)  | 0.792    |
| Sex                          |             |             |            | 0.001    |
| Female                       | 13(81%)     | 41(76%)     | 5(29%)     |          |
| Male                         | 3(19%)      | 13(24%)     | 12(71%)    |          |
| Size                         | 80(30-170)  | 90(15-230)  | 70(30-205) | 0.966    |
| Size.cut                     |             |             |            | 0.692    |
| [ 15, 21]                    | 0(0%)       | 3(6%)       | 0(0%)      |          |
| [ 21, 51]                    | 5(31%)      | 13(24%)     | 3(18%)     |          |
| [ 51,100]                    | 4(25%)      | 18(33%)     | 9(53%)     |          |
| [100,230]                    | 7(44%)      | 20(37%)     | 5(29%)     |          |
| Grade                        |             |             |            | 0.001    |
| 1                            | 2(12%)      | 8(15%)      | 0(0%)      |          |
| 2                            | 4(25%)      | 32(59%)     | 4(24%)     |          |
| 3                            | 9(56%)      | 14(26%)     | 13(76%)    |          |
| Location.of.first.metastasis |             |             |            | 0.493    |
| Lung only                    | 2(12%)      | 9(17%)      | 5(29%)     |          |
| No Met                       | 7(44%)      | 28(52%)     | 9(53%)     |          |
| Other Met                    | 7(44%)      | 17(31%)     | 3(18%)     |          |
| Site.of.tumour               |             |             |            | 0        |
| Gynaecological area          | 4(25%)      | 3(6%)       | 1(6%)      |          |
| Internal trunk               | 4(25%)      | 36(67%)     | 2(12%)     |          |
| Others                       | 8(50%)      | 7(13%)      | 6(35%)     |          |
| Upper.Lower.limb             | 0(0%)       | 8(15%)      | 8(47%)     |          |
| Site.of.tumour               |             |             |            | 0.072    |
| Gynaecological area          | 4(25%)      | 3(6%)       | 1(6%)      |          |
| Others                       | 12(75%)     | 51(94%)     | 16(94%)    |          |

Supplemental Table 3: The correlation between immune clusters and clinical factors in TCGA cohort. Although, there was no association observed between immune clusters defined by 90 gene signature method and clinical factors **(A)**, there may be some association between immune clusters defined by CIBERSORT method and clinical factors **(B)**. For example, the immune “hot” cluster T-Hi seemed to associate with iLMS in TCGA cohort indicated by red arrow.

**A**

|                  | T-C       | T-H        | p values |
|------------------|-----------|------------|----------|
| All Subjects     | 36        | 18         |          |
| Age.at.diagnosis | 63(37-90) | 58(33-82)  | 0.393    |
| Sex              |           |            | 0.083    |
| FEMALE           | 22(61%)   | 6(33%)     |          |
| MALE             | 14(39%)   | 12(67%)    |          |
| Grade            |           |            | 0.579    |
| 1                | 1(3%)     | 1(6%)      |          |
| 2                | 26(72%)   | 11(61%)    |          |
| 3                | 9(25%)    | 6(33%)     |          |
| LMS Classifier   |           |            | 0.662    |
| hLMS             | 21(58%)   | 9(50%)     |          |
| oLMS             | 9(25%)    | 7(39%)     |          |
| unclass          | 6(17%)    | 2(11%)     |          |
| HRD Score        | 29(6-72)  | 20.5(0-61) | 0.635    |
| LMS Subtypes     |           |            | 0.303    |
| cLMS             | 21(58%)   | 9(50%)     |          |
| iLMS             | 7(19%)    | 7(39%)     |          |
| Location         |           |            | 1        |
| Internal trunk   | 21(58%)   | 11(61%)    |          |
| Limb             | 15(42%)   | 7(39%)     |          |

**B**

|                  | T-Hi      | T-L       | T-M       | p values |
|------------------|-----------|-----------|-----------|----------|
| All Subjects     | 14        | 11        | 29        |          |
| Age.at.diagnosis | 58(42-80) | 69(47-82) | 63(33-90) | 0.211    |
| Sex              |           |           |           | 0.134    |
| FEMALE           | 4(29%)    | 7(64%)    | 17(59%)   |          |
| MALE             | 10(71%)   | 4(36%)    | 12(41%)   |          |
| Grade            |           |           |           | 0.137    |
| 1                | 1(7%)     | 0(0%)     | 1(3%)     |          |
| 2                | 9(64%)    | 5(45%)    | 23(79%)   |          |
| 3                | 4(29%)    | 6(55%)    | 5(17%)    |          |
| HRD Score        | 32(0-61)  | 31(9-55)  | 20(5-72)  | 0.213    |
| LMS Subtypes     |           |           |           | 0        |
| cLMS             | 4(29%)    | 2(18%)    | 24(83%)   |          |
| iLMS             | 6(43%)    | 4(36%)    | 4(14%)    |          |
| Location         |           |           |           | 0.001    |
| Internal trunk   | 7(50%)    | 2(18%)    | 23(79%)   |          |
| Limb             | 7(50%)    | 9(82%)    | 6(21%)    |          |

Supplemental Figure 1. The dendrograms (generated from 90 gene signature method) demonstrated that immune hot signature **I-H (above)** and immune cold signature **I-L (below)** are mostly homogenous across different tumor regions of the same patient' tumor in ICGC cohort. There were 22 patients who had multiple tumor samples (between 2 -6) taken from the same tumor.

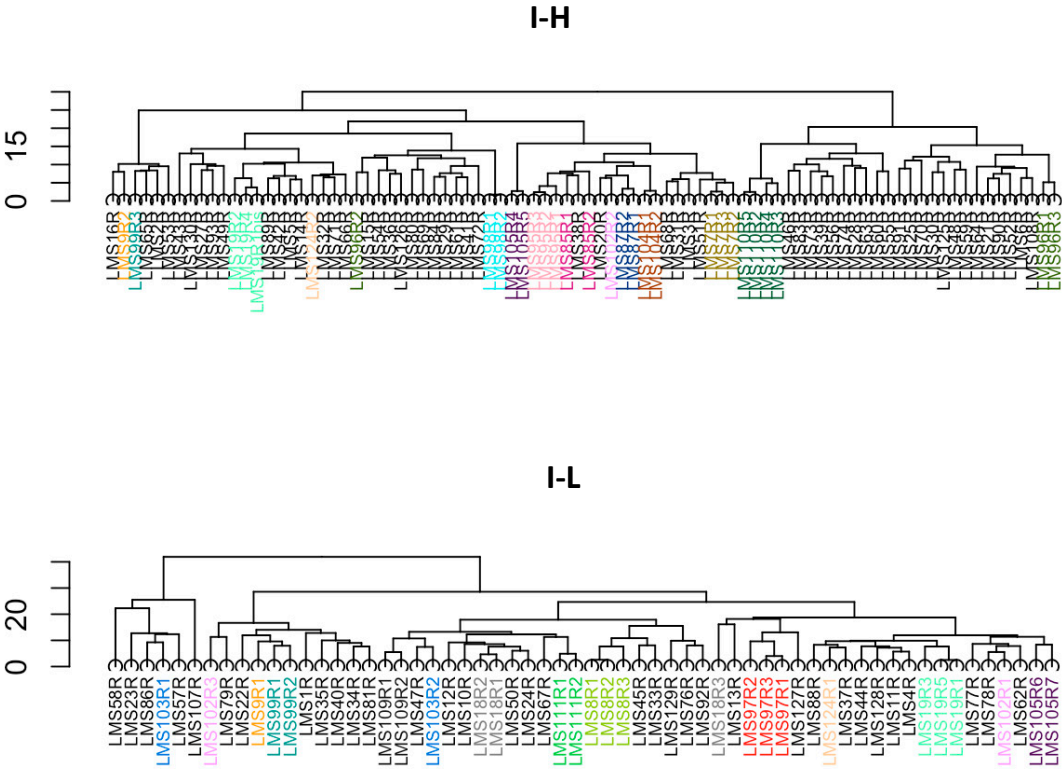

Supplemental Figure 2: Kaplan-Meier (KM) curves demonstrated that immune clusters regardless of methods (90 gene signature and CIBERSORT) used did not predict distant-metastasis free survival (DMFS) (**A and C**) as well as overall survival (OS) (**B and D**) in ICGC cohort.

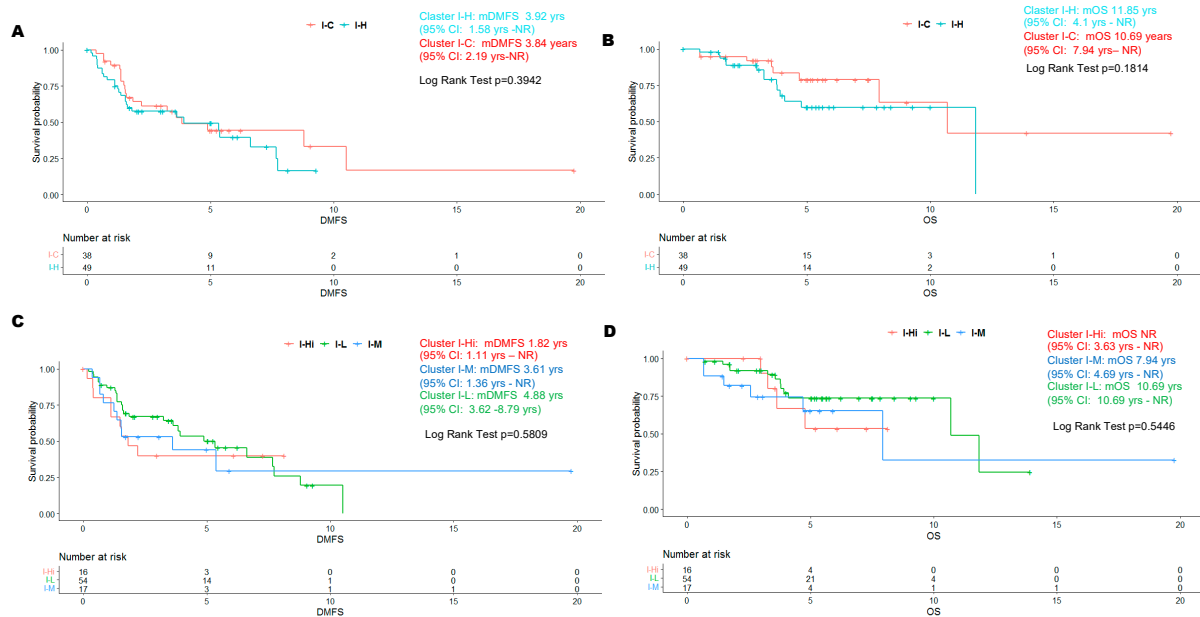

Supplemental Figure 3: Kaplan-Meier (KM) curves demonstrated that immune clusters regardless of methods (90 gene signature and CIBERSORT) used did not predict distant-metastasis free survival (DMFS) (**A and C**) as well as overall survival (OS) (**B and D**) in TCGA cohort.

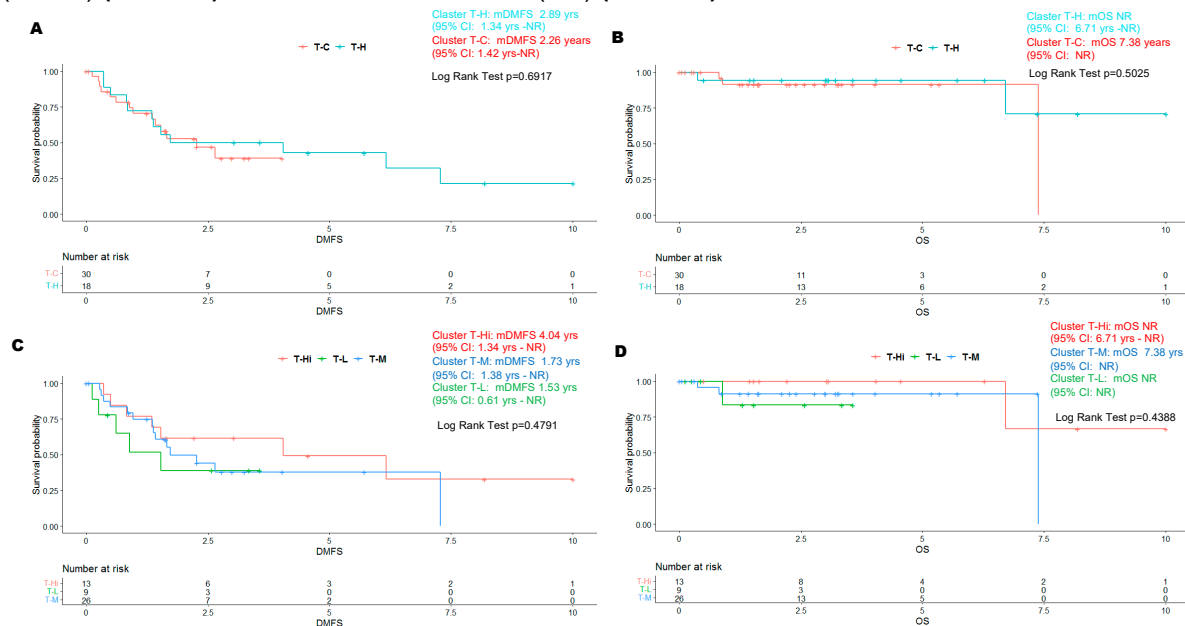

Supplement: s1 [file s1]
